# Supplementary material for: Vertically resolved characteristics of air pollution during two severe winter haze episodes in urban Beijing, China
Source: Copernicus journal article supplement (doi:10.5194/acp-18-2495-2018), 2018-02-20
Supplement: Supplementary file [file acp-18-2495-2018-supplement.pdf]

Supplement of Atmos. Chem. Phys., 18, 2495–2509, 2018  
<https://doi.org/10.5194/acp-18-2495-2018-supplement>  
© Author(s) 2018. This work is distributed under  
the Creative Commons Attribution 4.0 License.

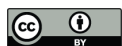

*Supplement of*

## **Vertically resolved characteristics of air pollution during two severe winter haze episodes in urban Beijing, China**

**Qingqing Wang et al.**

*Correspondence to:* Yele Sun (sunyele@mail.iap.ac.cn)

The copyright of individual parts of the supplement might differ from the CC BY 4.0 License.

Table S1. The date and time for each vertical profile measured in this study.

| No. | height(m) | Date       | Starting time,<br>Up | Ending time, Up | Starting time,<br>Down | Ending time,<br>Down |
|-----|-----------|------------|----------------------|-----------------|------------------------|----------------------|
| 1   | 260       | 11-19-2014 | 09:13:00             | 09:44:00        | 09:46:00               | 10:12:00             |
| 2   | 260       | 11-19-2014 | 12:04:00             | 12:32:30        | 12:33:00               | 12:59:00             |
| 3   | 260       | 11-19-2014 | 15:06:30             | 15:34:50        | 15:35:05               | 16:01:00             |
| 4   | 200       | 11-19-2014 | 18:05:30             | 18:27:50        | 18:28:00               | 18:48:20             |
| 5   | 200       | 11-19-2014 | 22:05:00             | 22:27:35        | 22:27:50               | 22:48:30             |
| 6   | 200       | 11-20-2014 | 02:05:00             | 02:27:20        | 02:30:25               | 02:50:45             |
| 7   | 200       | 11-20-2014 | 06:05:00             | 06:27:15        | 06:27:40               | 06:48:00             |
| 8   | 260       | 11-20-2014 | 10:04:45             | 10:33:10        | 10:33:20               | 10:59:40             |
| 9   | 260       | 11-20-2014 | 14:05:15             | 14:33:35        | 14:33:50               | 14:59:02             |
| 10  | 260       | 11-20-2014 | 16:23:00             | 16:51:30        | 16:51:50               | 17:18:00             |
| 11  | 200       | 11-20-2014 | 20:03:30             | 20:25:40        | 20:25:50               | 20:46:20             |
| 12  | 200       | 11-20-2014 | 23:05:00             | 23:27:15        | 23:27:30               | 23:47:50             |
| 13  | 200       | 11-21-2014 | 03:05:00             | 03:27:15        | 03:27:30               | 03:47:50             |
| 14  | 260       | 11-21-2014 | 07:05:00             | 07:34:56        | 07:35:15               | 08:01:25             |
| 15  | 260       | 11-21-2014 | 10:03:20             | 10:31:55        | 10:32:10               | 10:58:18             |
| 16  | 260       | 11-21-2014 | 13:17:15             | 13:45:50        | 13:46:20               | 14:12:25             |
| 17  | 260       | 11-21-2014 | 16:07:50             | 16:32:40        | 16:33:00               | 16:55:37             |
| 18  | 260       | 01-12-2015 | 12:19:15             | 12:47:54        | 13:04:05               | 13:30:15             |
| 19  | 260       | 01-12-2015 | 16:18:30             | 16:47:10        | 17:04:45               | 17:30:50             |
| 20  | 200       | 01-12-2015 | 20:20:10             | 20:42:45        | 21:04:15               | 21:26:45             |
| 21  | 200       | 01-13-2015 | 00:20:00             | 00:42:24        | 01:10:00               | 01:32:50             |
| 22  | 200       | 01-13-2015 | 06:20:00             | 06:45:20        | 07:10:00               | 07:33:40             |
| 23  | 260       | 01-13-2015 | 10:17:50             | 10:44:37        | 11:05:00               | 11:31:10             |
| 24  | 260       | 01-13-2015 | 14:19:15             | 14:47:04        | 15:05:00               | 15:31:10             |
| 25  | 200       | 01-13-2015 | 17:19:35             | 17:47:25        | 18:04:10               | 18:30:17             |
| 26  | 200       | 01-13-2015 | 20:29:20             | 20:51:00        | 21:04:30               | 21:24:57             |
| 27  | 200       | 01-14-2015 | 00:19:10             | 00:41:00        | 01:09:42               | 01:30:05             |
| 28  | 200       | 01-14-2015 | 06:20:16             | 06:41:52        | 07:09:37               | 07:30:03             |
| 29  | 260       | 01-14-2015 | 10:19:20             | 10:47:15        | 11:04:15               | 11:30:25             |
| 30  | 260       | 01-14-2015 | 14:19:05             | 14:46:30        | 15:05:20               | 15:31:30             |
| 31  | 200       | 01-14-2015 | 18:19:18             | 18:41:45        | 19:11:22               | 19:32:42             |
| 32  | 200       | 01-15-2015 | 00:20:00             | 00:41:50        | 01:10:00               | 01:30:30             |
| 33  | 200       | 01-15-2015 | 06:20:00             | 06:41:45        | 07:10:00               | 07:30:30             |
| 34  | 260       | 01-15-2015 | 12:19:50             | 12:47:40        | 13:04:55               | 13:31:02             |
| 35  | 260       | 01-15-2015 | 16:30:28             | 16:58:10        | 17:28:13               | 17:54:20             |
| 36  | 200       | 01-15-2015 | 23:20:00             | 23:41:40        | (01-16)<br>00:25:00    | (01-16)<br>00:45:20  |

Table S2. A summary of vertical profiles of Type 1, which includes the number of vertical profile as indicated in Figure 1, traveling direction (up or down), measuring time, slope of extinction vs. height ( $\text{Mm}^{-1}/\text{m}$ ), vertical difference ( $\text{Diff} (\%) = (\text{max}-\text{min})/(2*\text{mean})*100$ ), temperature inversion height (TVH, no values mean no temperature inversions), sampling height (SH, 200 m or 260 m), and mixing layer height (MLH) from ceilometers measurements.

| No.             | Travel | Time  | Slope | Diff (%) | TVH | SH  | MLH  |
|-----------------|--------|-------|-------|----------|-----|-----|------|
| <b>November</b> |        |       |       |          |     |     |      |
| 2               | up     | 12:04 | 0.08  | 4%       |     | 260 | 432  |
| 2               | down   | 12:33 | -0.31 | 5%       |     | 260 | 432  |
| 3               | up     | 15:06 | -0.11 | 2%       |     | 260 | 577  |
| 3               | down   | 15:35 | -0.08 | 2%       |     | 260 | 577  |
| 9               | up     | 14:05 | -0.08 | 3%       |     | 260 | 370  |
| 9               | down   | 14:33 | 0.19  | 4%       |     | 260 | 370  |
| 11              | up     | 20:03 | -0.12 | 5%       | 120 | 200 | 212  |
| 16              | up     | 13:17 | -0.02 | 5%       |     | 260 | 548  |
| 16              | down   | 13:46 | -0.09 | 7%       |     | 260 | 548  |
| <b>January</b>  |        |       |       |          |     |     |      |
| 18              | down   | 13:04 | -0.02 | 4%       |     | 260 | 895  |
| 22              | up     | 6:20  | -0.18 | 6%       |     | 200 | 537  |
| 23              | down   | 11:05 | 0.14  | 7%       |     | 260 | 528  |
| 24              | up     | 14:19 | 0.00  | 3%       |     | 260 | 795  |
| 24              | down   | 15:05 | -0.03 | 4%       |     | 260 | 938  |
| 26              | up     | 20:29 | -0.09 | 3%       |     | 200 | 867  |
| 27              | down   | 1:09  | -0.11 | 5%       |     | 200 | 253  |
| 28              | up     | 6:20  | -0.01 | 3%       |     | 200 |      |
| 28              | down   | 7:09  | 0.04  | 4%       |     | 200 |      |
| 29              | up     | 10:19 | 0.17  | 5%       |     | 260 |      |
| 30              | up     | 14:19 | 0.02  | 3%       |     | 260 | 1120 |
| 31              | up     | 18:19 | 0.11  | 2%       |     | 200 | 1138 |
| 32              | up     | 0:20  | 0.02  | 2%       |     | 200 | 298  |
| 35              | up     | 16:30 | -0.48 | 5%       |     | 260 | 307  |
| 35              | down   | 17:28 | 0.00  | 4%       |     | 260 | 298  |
| 36              | up     | 23:20 | -0.26 | 2%       | 240 | 200 | 257  |
| 36              | down   | 0:25  | -0.10 | 2%       | 240 | 200 | 228  |

Table S3. A summary of vertical profiles of Type 2. The statistical parameters are the same as those in Table S2.

| No.             | Travel | Time  | Slope | Diff (%) | TVH | SH  | MLH  |
|-----------------|--------|-------|-------|----------|-----|-----|------|
| <b>November</b> |        |       |       |          |     |     |      |
| 4               | up     | 18:05 | -0.74 | 6%       | 280 | 200 | 338  |
| 4               | down   | 18:28 | -1.15 | 9%       | 280 | 200 | 338  |
| 5               | up     | 22:05 | -1.28 | 9%       | 280 | 200 | 238  |
| 5               | down   | 22:27 | -0.90 | 6%       | 280 | 200 | 238  |
| 8               | up     | 10:04 | -0.89 | 13%      | 200 | 260 | 220  |
| 8               | down   | 10:33 | -1.01 | 14%      | 200 | 260 | 220  |
| 15              | up     | 10:03 | -0.39 | 11%      | 200 | 260 | 307  |
| 15              | down   | 10:32 | -0.12 | 7%       | 200 | 260 | 307  |
| 17              | up     | 16:07 | -0.10 | 40%      |     | 260 | 338  |
| 17              | down   | 16:33 | -0.06 | 32%      |     | 260 | 338  |
| <b>January</b>  |        |       |       |          |     |     |      |
| 18              | up     | 12:19 | -0.17 | 10%      |     | 260 | 822  |
| 19              | down   | 17:04 | -0.92 | 18%      |     | 260 | 275  |
| 20              | down   | 21:04 | -1.03 | 10%      |     | 200 | 283  |
| 21              | up     | 0:20  | -0.87 | 8%       |     | 200 | 260  |
| 25              | up     | 17:19 | -0.37 | 7%       |     | 200 |      |
| 25              | down   | 18:04 | -0.49 | 7%       |     | 200 |      |
| 29              | down   | 11:04 | -0.58 | 9%       |     | 260 |      |
| 30              | down   | 15:05 | -0.38 | 6%       |     | 260 | 1415 |
| 31              | down   | 19:11 | -1.45 | 12%      |     | 200 | 785  |
| 34              | down   | 13:04 | -2.78 | 21%      |     | 260 | 546  |

Table S4. A summary of vertical profiles of Type 3. The statistical parameters are the same as those in Table S2.

| No.             | Travel | Time  | Slope | Diff (%) | TVH | SH  | MLH  |
|-----------------|--------|-------|-------|----------|-----|-----|------|
| <b>November</b> |        |       |       |          |     |     |      |
| 1               | up     | 9:13  | 2.13  | 31%      | 180 | 260 | 297  |
| 1               | down   | 9:46  | 0.52  | 13%      | 180 | 260 | 297  |
| 12              | up     | 23:05 | 1.03  | 6%       | 120 | 200 | 220  |
| 12              | down   | 23:27 | 1.54  | 6%       | 120 | 200 | 220  |
| <b>January</b>  |        |       |       |          |     |     |      |
| 19              | up     | 16:18 | 0.58  | 68%      |     | 260 | 1020 |
| 21              | down   | 1:10  | 0.30  | 4%       |     | 200 | 270  |
| 26              | down   | 21:04 | 0.37  | 5%       |     | 200 | 465  |
| 27              | up     | 0:19  | 0.85  | 10%      |     | 200 | 330  |
| 33              | up     | 6:20  | 0.92  | 20%      | 180 | 200 | 298  |
| 33              | down   | 7:10  | 0.53  | 11%      | 180 | 200 | 313  |
| 34              | up     | 12:19 | 0.66  | 8%       |     | 260 | 648  |

Table S5. A summary of vertical profiles of Type 4. The statistical parameters are the same as those in Table S2.

| <b>No.</b>      | <b>Travel</b> | <b>Time</b> | <b>Slope</b> | <b>Diff (%)</b> | <b>TVH</b> | <b>SH</b> | <b>MLH</b> |
|-----------------|---------------|-------------|--------------|-----------------|------------|-----------|------------|
| <b>November</b> |               |             |              |                 |            |           |            |
| 6               | up            | 2:05        | -0.91        | 8%              | 120        | 200       | 190        |
| 6               | down          | 2:30        | -1.36        | 10%             | 120        | 200       | 190        |
| 7               | up            | 6:05        | -2.83        | 19%             | 120        | 200       | 173        |
| 7               | down          | 6:27        | -1.81        | 15%             | 120        | 200       | 173        |
| 13              | up            | 3:05        | -1.16        | 9%              | 120        | 200       | 245        |
| 13              | down          | 3:27        | -1.26        | 8%              | 120        | 200       | 245        |
| 14              | up            | 7:05        | -2.49        | 26%             | 120        | 260       | 208        |
| 14              | down          | 7:35        | -1.77        | 23%             | 120        | 260       | 208        |
| 11              | down          | 20:25       | -5.01        | 25%             | 100        | 200       | 212        |
| <b>January</b>  |               |             |              |                 |            |           |            |
| 20              | up            | 20:20       | -0.80        | 17%             | 180        | 200       | 207        |

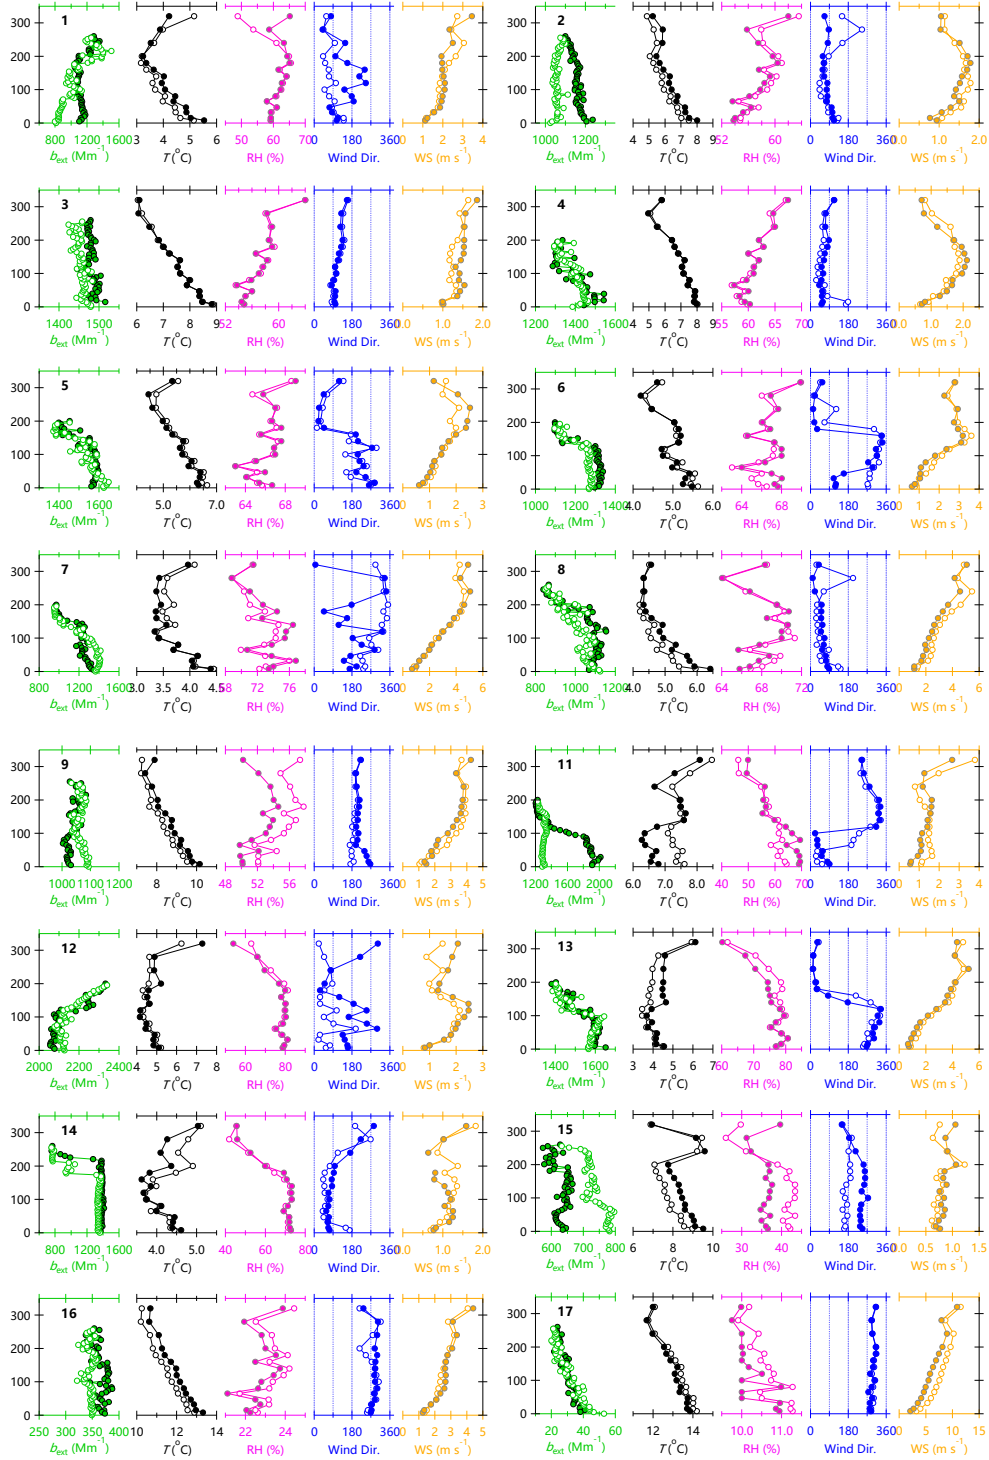

Figure S1. Vertical profiles of  $b_{\text{ext}}$ , Temperature ( $T$ ), relative humidity (RH), wind direction and wind speed (WS) in November. The solid circles represent the down profiles while others are up profiles.

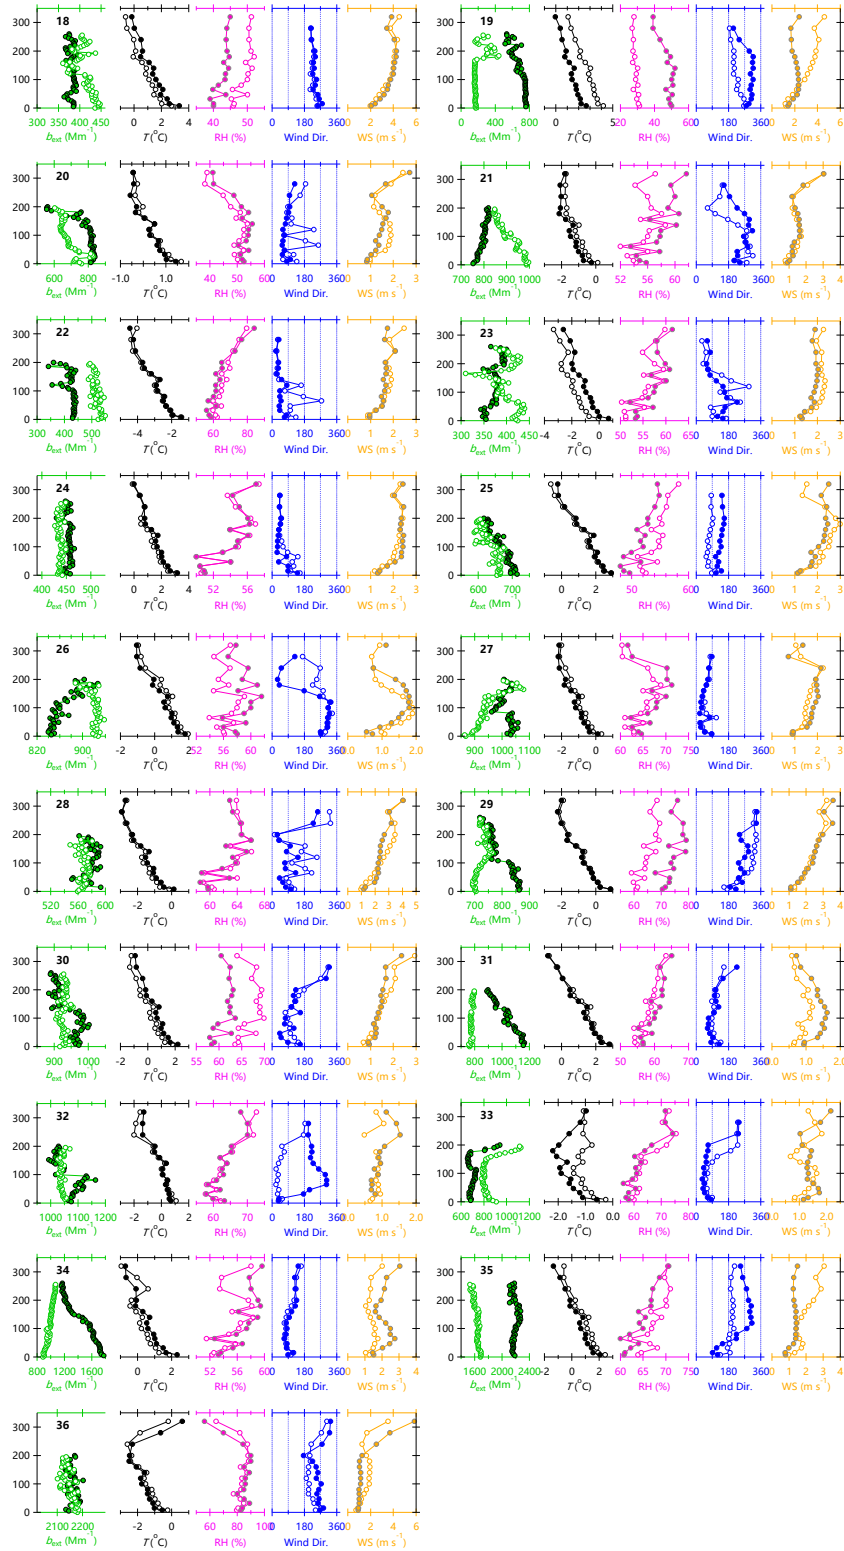

Figure S2. Vertical profiles of  $b_{\text{ext}}$ , Temperature ( $T$ ), relative humidity (RH), wind direction and wind speed (WS) in January. The solid circles represent the down profiles while others are up profiles.

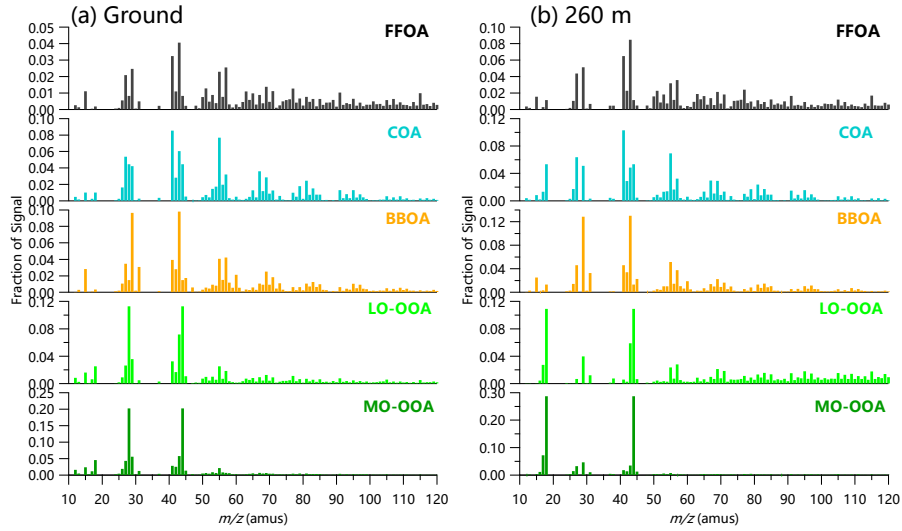

Figure S3. Mass spectral profiles of five OA factors at ground site and 260 m, including fossil fuel related OA (FFOA), cooking OA (COA), biomass burning OA (BBOA), less oxidized oxygenated OA (LO-OOA), and more oxidized OOA (MO-OOA).

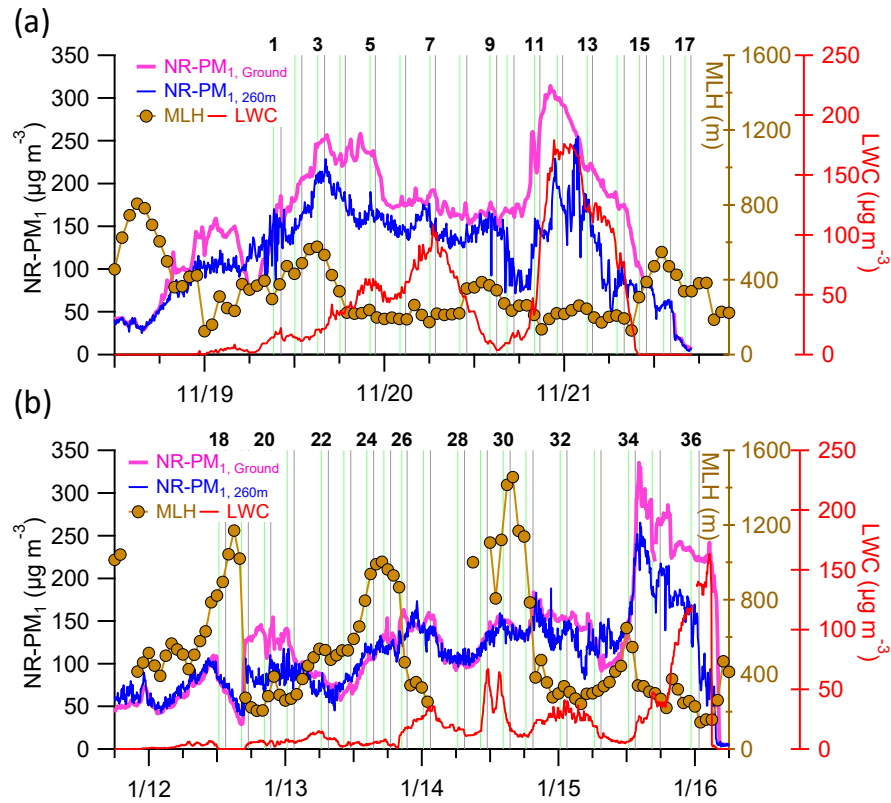

Figure S4. Time series of NR-PM<sub>1</sub> mass concentrations at ground level and 260 m, liquid water content (LWC), and mixing layer height (MLH) during the two haze episodes. The number of vertical profile experiments is also marked in green (up) and gray (down) vertical lines, and the time for each vertical profile is detailed in Table S1.



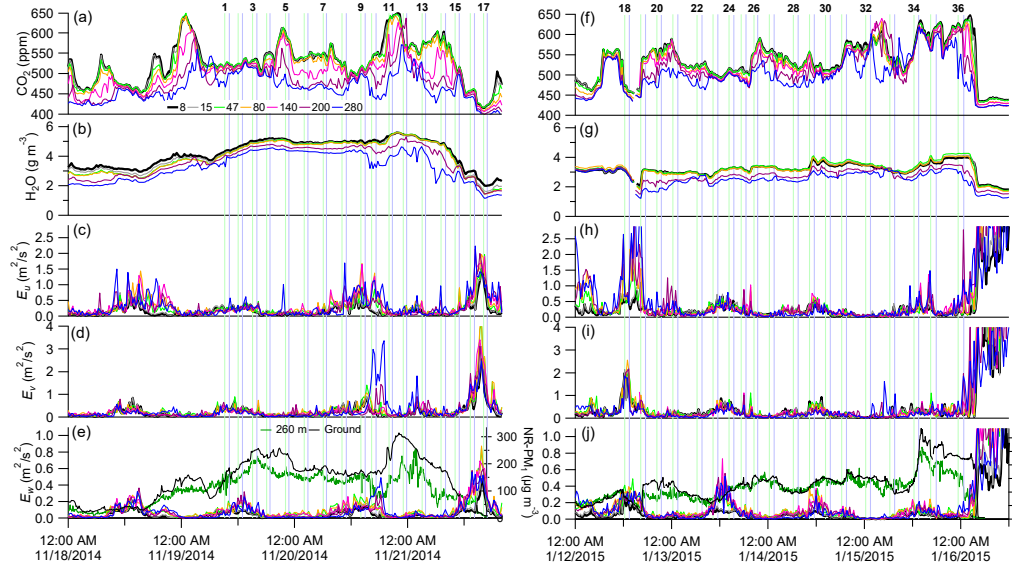

Figure S5. Time series of  $\text{CO}_2$ ,  $\text{H}_2\text{O}$ ,  $E_{it}$ ,  $E_v$ , and  $E_w$  at 7 heights (8, 15, 47, 80, 140, 200, and 280 m) during the two haze episodes. The number of vertical profile experiments is marked as green (up) and gray (down) vertical lines. Also shown is the time series of NR- $\text{PM}_{10}$  mass concentrations at ground level and 260 m.

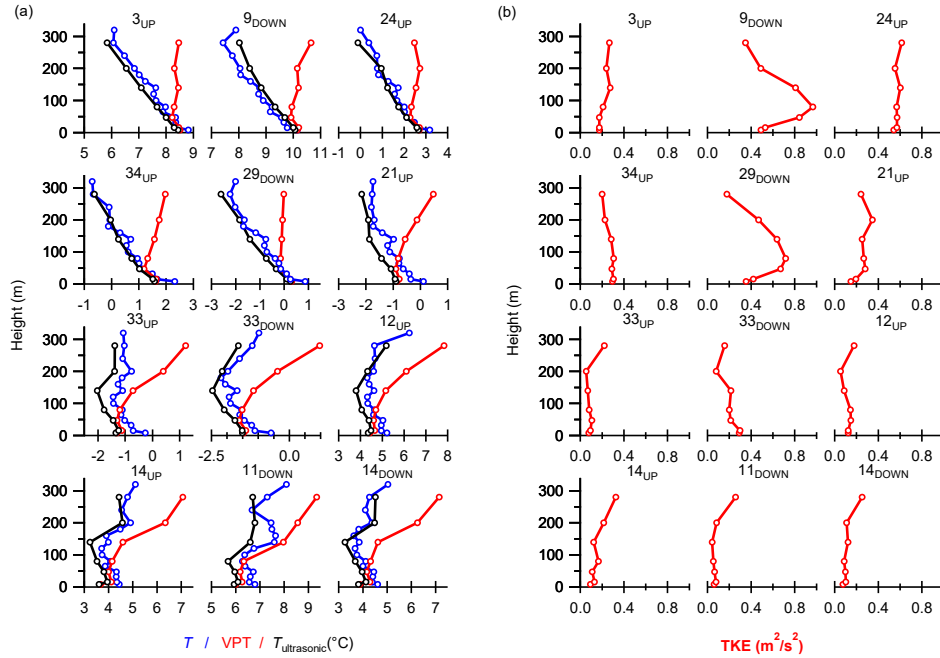

Figure S6. Comparisons of vertical profiles of  $T$ ,  $VPT$ ,  $T_{\text{ultrasonic}}$ , and  $TKE$  for four types of vertical profiles. “UP” and “DOWN” indicate the vertical profiles measured during the up and down experiments, respectively. Note that the temperature measured at 15 heights with the standard meteo probe (model HC2-S3, ROTRONIC) is systematically higher than that measured at 7 heights with ultrasonic anemometers (Gill Instruments Limited, Lymington, UK), but the differences are generally less than  $1^\circ\text{C}$ .

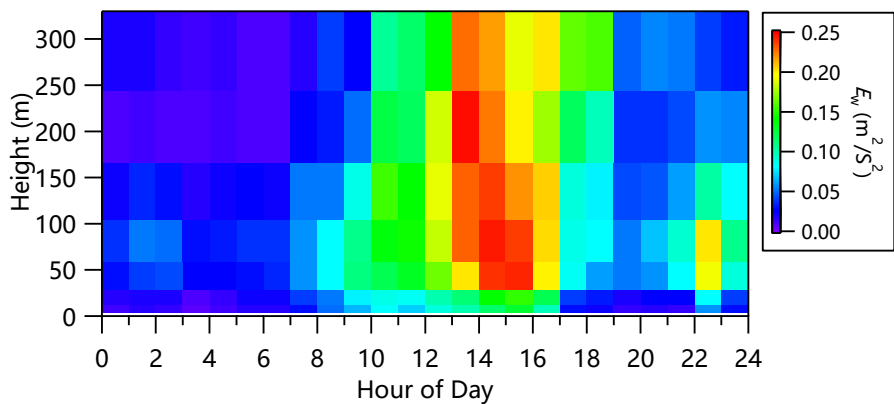

Figure S7. Diurnal cycle of  $E_w$  at 7 heights during the haze episode in November.

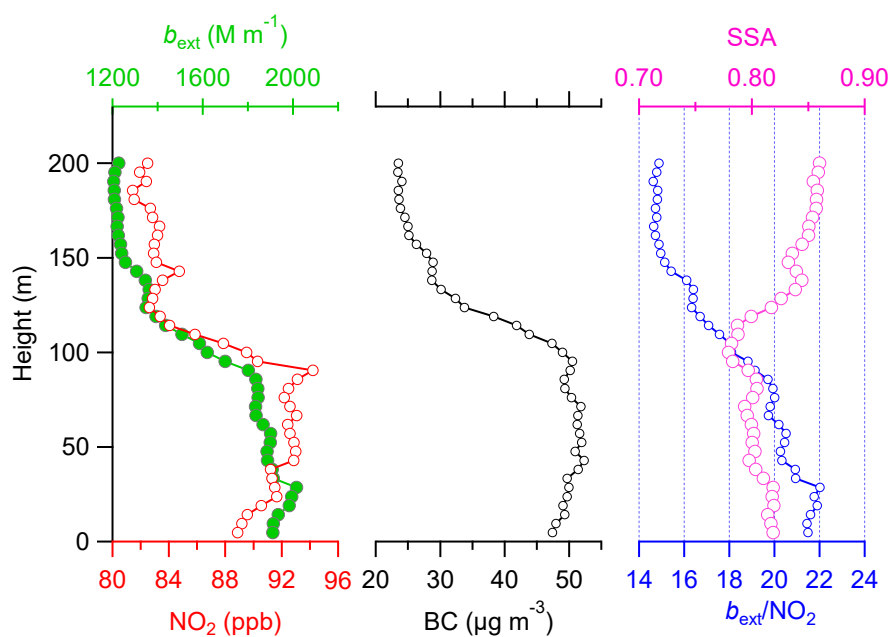

Figure S8. Vertical profiles of  $b_{ext}$ ,  $\text{NO}_2$ ,  $\text{BC}$ ,  $b_{ext}/\text{NO}_2$ , and  $\text{SSA}$  for V11.

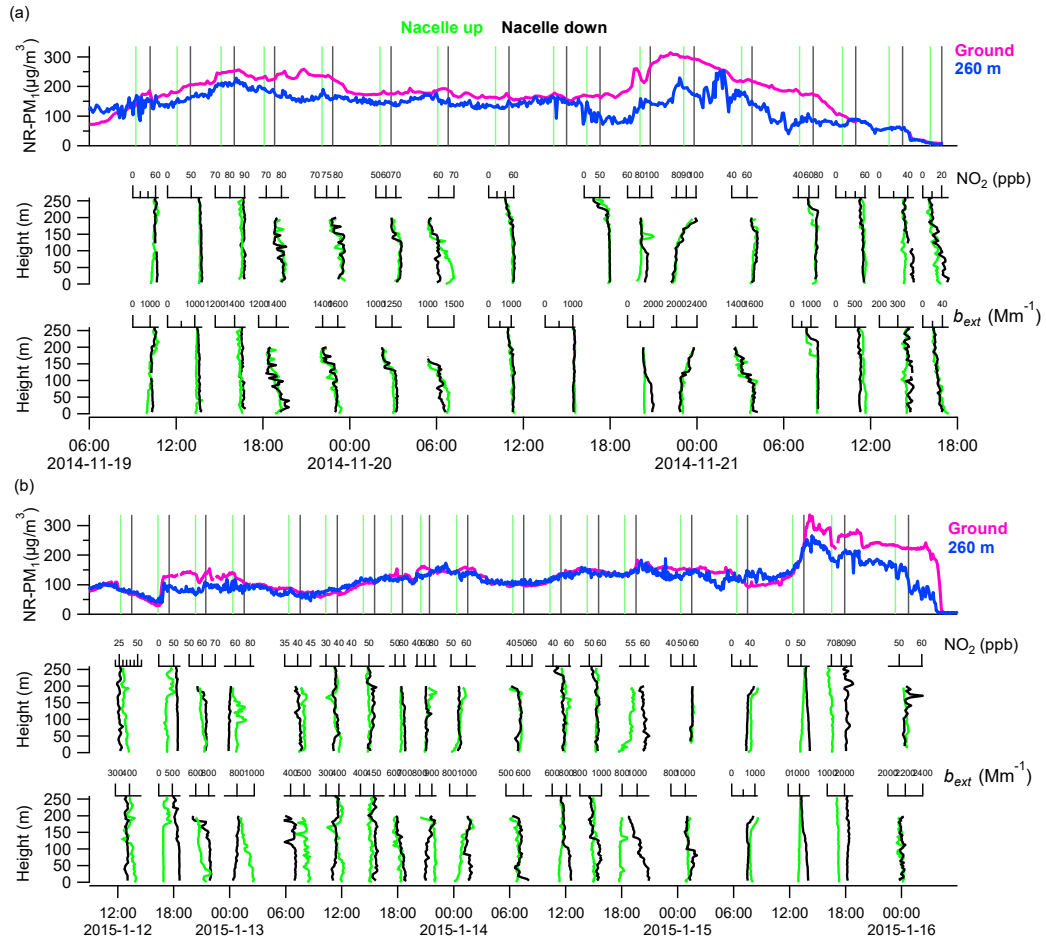

Figure S9. Vertical profiles of  $b_{ext}$ , NO<sub>2</sub> and the time series of NR-PM<sub>1</sub> mass concentrations at ground level and 260 m. The time range of each vertical profile experiment is marked on the time series of NR-PM<sub>1</sub> mass concentrations as light green (up) and gray (down) vertical lines, the green lines represent the up profiles while the black lines are down profiles.
